# Supplementary material
Source: Research Square preprint supplement (doi:10.21203/rs.3.rs-9354071/v1)
Supplement: Supplementary file 1 [file 7a3d8c075c36045ebfa6dd84.pdf]

# PROTOCOL FOR THE IDENTIFICATION AND MANAGEMENT OF HYPERTENSION IN ADULTS IN PRIMARY CARE

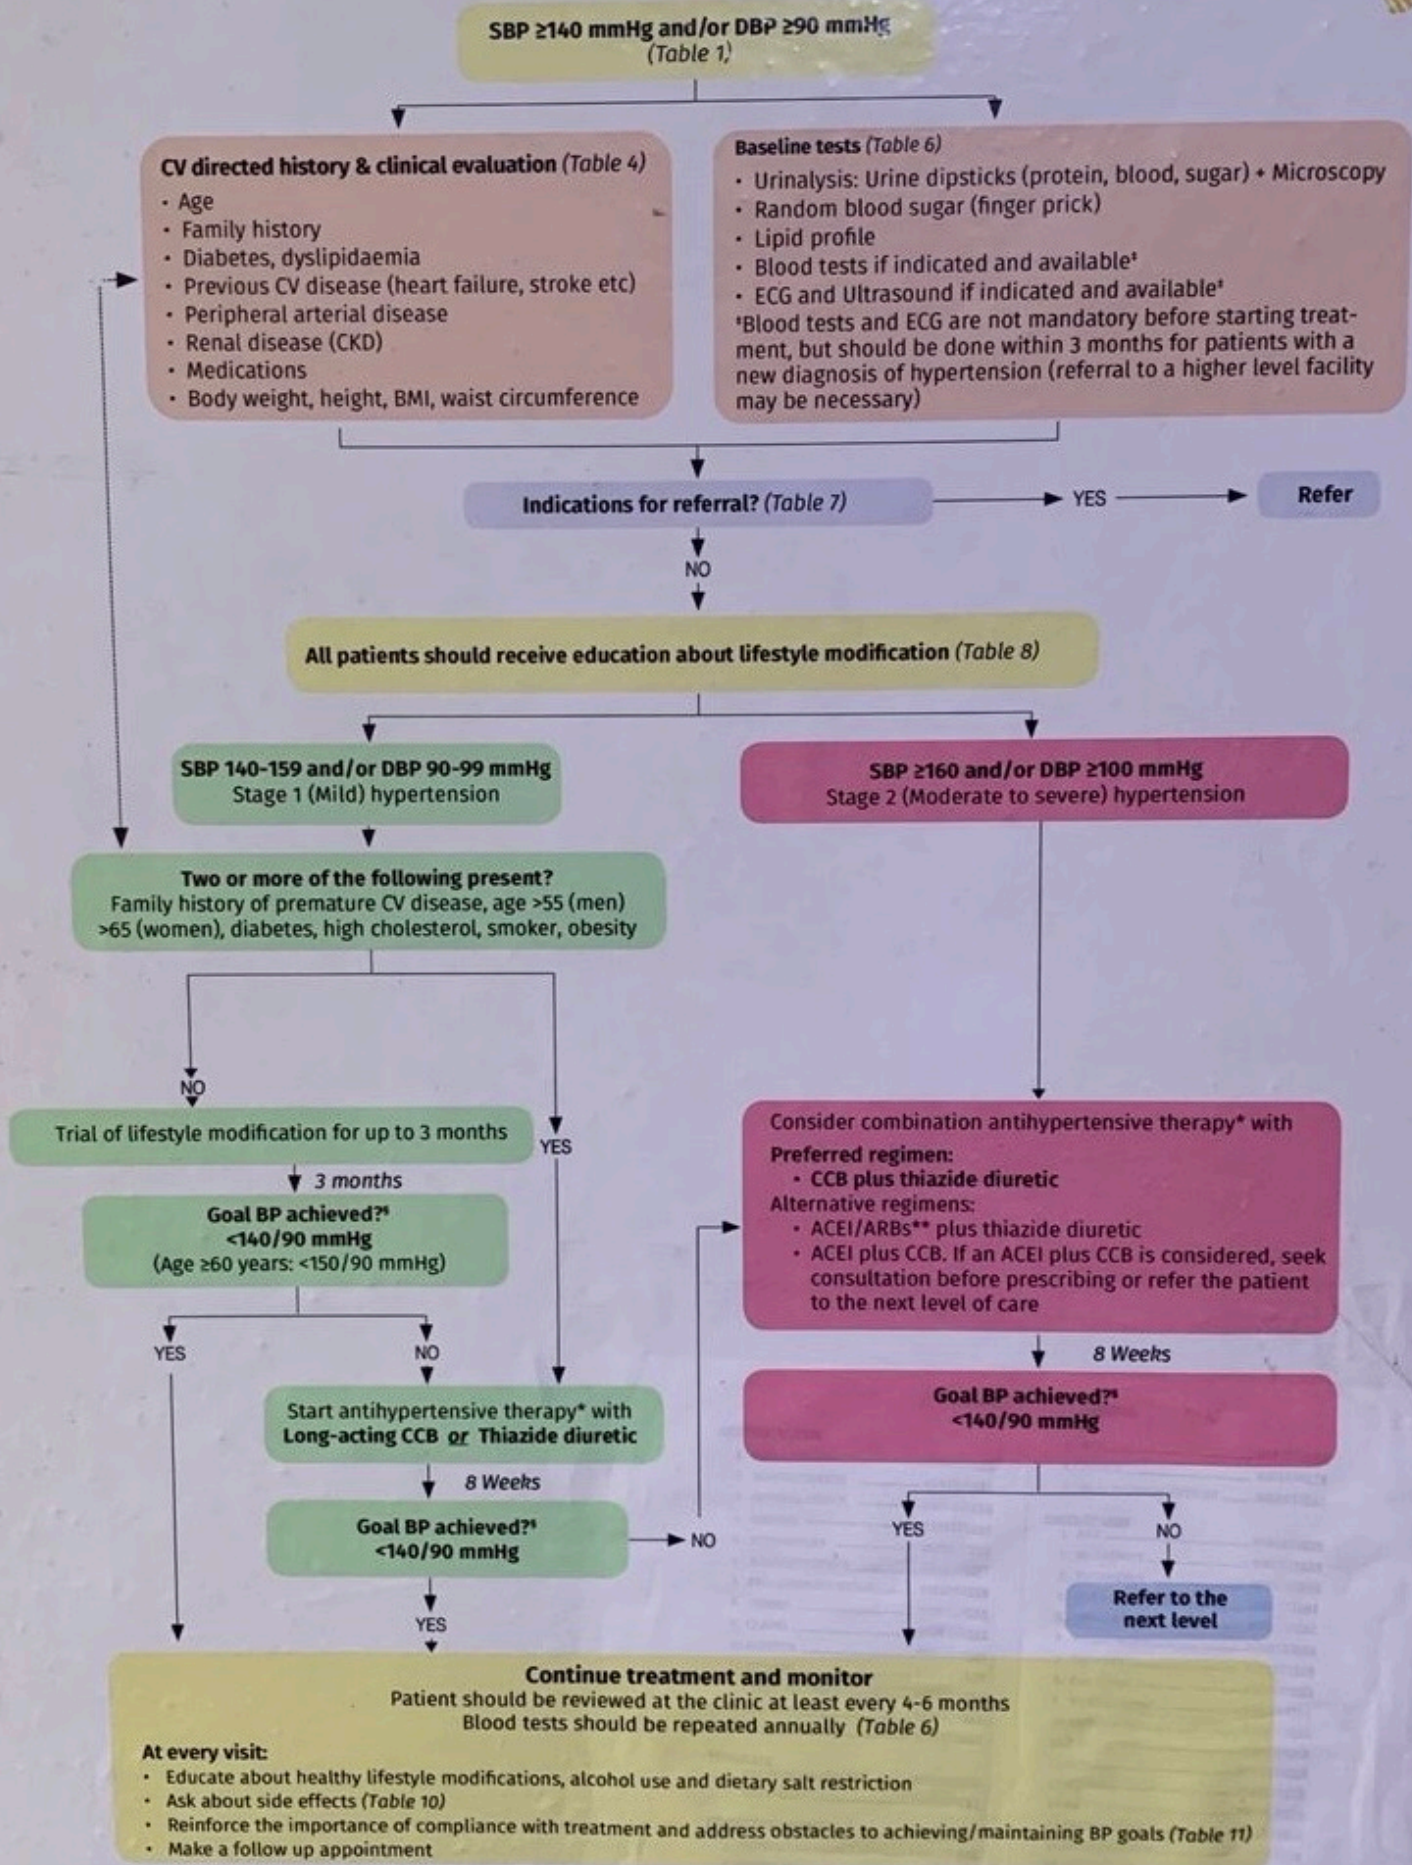

§If goal BP is not achieved, assess compliance with medication, alcohol use and use of NSAIDs before deciding to intensify antihypertensive therapy (see Table 11)

\*If no contraindications (see Table 9); \*\* Consider renal function tests before starting treatment

ACEI: Angiotensin converting enzyme inhibitor; CCB: Calcium channel blocker; CKD: Chronic kidney disease; CV: Cardiovascular; DBP: Diastolic blood pressure; NSAIDs: nonsteroidal anti-inflammatory drugs; SBP: Systolic blood pressure; < Less than; > Higher than; ≥ Equal to or higher than
